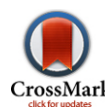

# Novel Bioassay for the Discovery of Inhibitors of the 2-C-Methyl-D-erythritol 4-Phosphate (MEP) and Terpenoid Pathways Leading to Carotenoid Biosynthesis

Natália Corniani<sup>1</sup>, Edivaldo D. Velini<sup>1</sup>, Ferdinando M. L. Silva<sup>1</sup>, N. P. Dhammika Nanayakkara<sup>2</sup>, Matthias Witschel<sup>3</sup>, Franck E. Dayan<sup>4\*</sup>

**1** São Paulo State University, Faculty of Agronomic Sciences, Botucatu, SP, Brazil, **2** National Center for Natural Products Research, School of Pharmacy, University of Mississippi, University, MS, United States of America, **3** BASF SE, GVA/HC-B009, Ludwigshafen, Germany, **4** USDA-ARS Natural Products Utilization Research Unit, University, MS, United States of America

## Abstract

The 2-C-methyl-D-erythritol 4-phosphate (MEP) pathway leads to the synthesis of isopentenyl diphosphate in plastids. It is a major branch point providing precursors for the synthesis of carotenoids, tocopherols, plastoquinone and the phytyl chain of chlorophylls, as well as the hormones abscisic acid and gibberellins. Consequently, disruption of this pathway is harmful to plants. We developed an *in vivo* bioassay that can measure the carbon flow through the carotenoid pathway. Leaf cuttings are incubated in the presence of a phytoene desaturase inhibitor to induce phytoene accumulation. Any compound reducing the level of phytoene accumulation is likely to interfere with either one of the steps in the MEP pathway or the synthesis of geranylgeranyl diphosphate. This concept was tested with known inhibitors of steps of the MEP pathway. The specificity of this *in vivo* bioassay was also verified by testing representative herbicides known to target processes outside of the MEP and carotenoid pathways. This assay enables the rapid screen of new inhibitors of enzymes preceding the synthesis of phytoene, though there are some limitations related to the non-specific effect of some inhibitors on this assay.

**Citation:** Corniani N, Velini ED, Silva FML, Nanayakkara NP, Witschel M, et al. (2014) Novel Bioassay for the Discovery of Inhibitors of the 2-C-Methyl-D-erythritol 4-Phosphate (MEP) and Terpenoid Pathways Leading to Carotenoid Biosynthesis. PLoS ONE 9(7): e103704. doi:10.1371/journal.pone.0103704

**Editor:** Manfred Jung, Albert-Ludwigs-University, Germany

**Received:** April 3, 2014; **Accepted:** July 1, 2014; **Published:** July 31, 2014

This is an open-access article, free of all copyright, and may be freely reproduced, distributed, transmitted, modified, built upon, or otherwise used by anyone for any lawful purpose. The work is made available under the Creative Commons CC0 public domain dedication.

**Data Availability:** The authors confirm that all data underlying the findings are fully available without restriction. All relevant data are within the paper and its Supporting Information files.

**Funding:** Grant# BEX 0226/12-2 from the Brazilian Agency CAPES (Coordination for the Improvement of Higher Education Personnel) that supported the research of N. Corniani in a USDA laboratory. The funders had no role in study design, data collection and analysis, decision to publish, or preparation of the manuscript.

**Competing Interests:** The authors from BASF SE, the University of Sao Paulo, The University of Mississippi and the USDA ARS declare that no competing interests exist. This does not alter our adherence to PLOS ONE policies on sharing data and materials.

\* Email: franck.dayan@ars.usda.gov

## Introduction

The terms isoprenoid, terpenoid, and terpene are used interchangeably in the literature to refer to a broad class of natural products derived from C5 isopentenyl diphosphate (IPP) [1,2]. Plants produce a myriad of isoprenoids that are functionally important in many physiological and biochemical processes [3,4]. Carotenoids comprise a large isoprenoid family that are derived from the C40 tetraterpenoid phytoene [5] and produced by all photosynthetic organisms (plants, algae and cyanobacteria) as well as certain non-photosynthetic bacteria and fungi [6]. In plants, carotenoids participate in photosynthetic processes, including light harvesting, energy conversion, electron transfer, and quenching of excited chlorophyll triplets [7] in addition to a number of other functions.

Through evolution, two independent biosynthetic routes have been selected for the synthesis of these two basic building blocks [8]. In the cytosol and mitochondria, IPP and dimethylallyl diphosphate (DMAPP) are assembled from three molecules of acetyl-CoA by the mevalonate (MVA) pathway. This pathway was first described in the early work of Bloch and Lynen [9,10], and

was thought to be the sole source of all terpenoids. However, it is now known that it is responsible for the synthesis of sterols and ubiquinone. The MVA pathway is the subject of several reviews [5,11], and is not the focus of this paper.

The existence of an alternative pathway was suggested based on the observation that genes encoding enzymes catalyzing the late steps of the MVA pathway are absent in some archaeal genomes [12]. Furthermore, plants treated with the herbicide clomazone had reduced carotenoid levels but their levels of sterols were not affected [13–15]. This plastid-localized independent pathway, called the 2-C-methyl-D-erythritol 4-phosphate (MEP) pathway (also non-mevalonate or 1-deoxy-D-xylulose 5-phosphate (DOXP) pathway), was reported in 1997 (Figure 1) [9,16–19]. The MEP pathway is a major branch point providing precursors for the synthesis of plastidic monoterpenes, diterpenes, carotenoids, the phytyl chain of chlorophylls, tocopherols, plastoquinone as well as the hormones abscisic acid and gibberellins. There is limited crossover between the two pathways [20,21].

The MEP and carotenoid pathways are well characterized and have been reviewed extensively [1,5,12,22]. Briefly, carotenoid

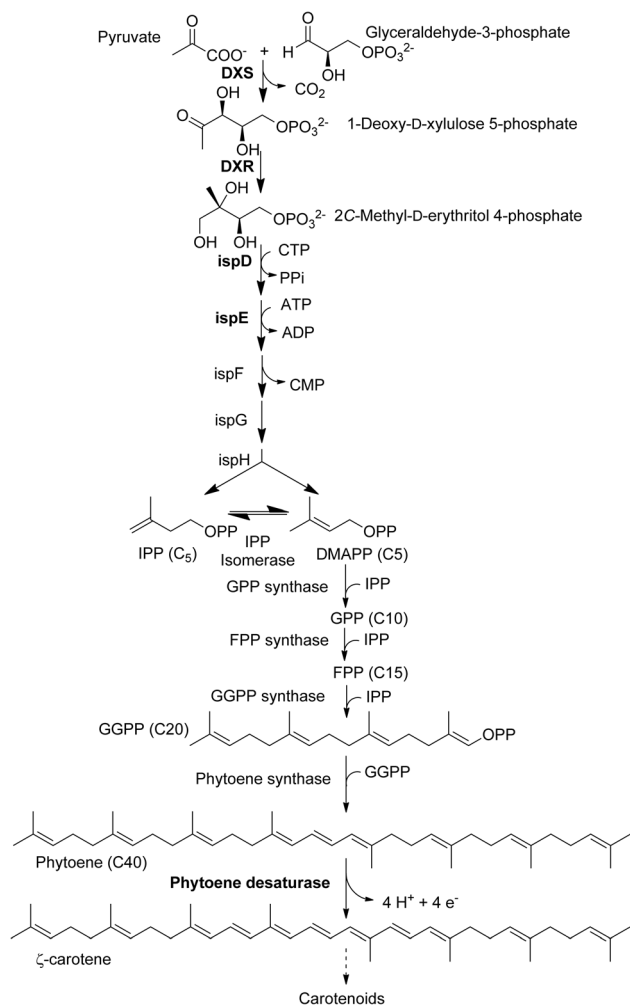

**Figure 1. Biosynthesis of carotenoids starts with the 2-C-methyl-D-erythritol 4-phosphate (MEP) pathway leading to the formation of IPP, continues with the isoprenoid pathway to obtain GGPP.** The first committed step to the synthesis of carotenoids consists of the head to head condensation of 2 GGPP to form phytoene. The enzymes in bold letters denote enzyme targets that were tested in this study.

doi:10.1371/journal.pone.0103704.g001

biosynthesis can be divided into three phases (Figure 1). Phase I includes the formation of IPP and DMAPP via the plastid-localized MEP pathway. The first step of the MEP pathway is catalyzed by 1-deoxy-D-xylulose 5-phosphate synthase (DXS, EC 2.2.1.7), converting pyruvate and glyceraldehyde-3-phosphate to 1-deoxy-D-xylulose 5-phosphate (DOXP). The intramolecular rearrangement and reduction of DOXP to 2-C-methyl-D-erythritol 4-phosphate (MEP) is catalyzed by 1-deoxy-D-xylulose 5-phosphate reductoisomerase (DXR, EC 1.1.1.267). Diverse experimental evidence demonstrates that DXS and DXR represent potential regulatory control points in the MEP pathway [23,24]. Phase I concludes with the formation of the C5 building blocks IPP and DMAPP. In Phase II, a single DMAPP serves as the substrate for successive head-to-tail condensations of IPP units to ultimately form the C20 geranylgeranyl diphosphate (GGPP) [25]. Phase III begins with the head to head condensation of two GGPP molecules to produce phytoene (Figure 1) by the enzyme phytoene synthase (PSY, EC 2.5.1.32). Subsequently, phytoene desaturase (PDS, EC 1.3.5.5) and  $\zeta$ -carotene desaturase (ZDS, EC 1.3.5.6)

catalyze similar dehydrogenation reactions introducing four double bonds in phytoene to form lycopene. Desaturation requires a plastid-localized terminal oxidase and plastoquinone in photosynthetic tissues [26,27].

Carotenoids are important for plant survival, especially in their role as protection from photooxidation [4,28]. Several important bleaching herbicides inhibit carotenoid synthesis [29]. PDS is the target site for several herbicides such as norflurazon, fluridone and flurochloridone [30]. When sensitive plants are exposed to these herbicides, PDS activity is inhibited, resulting in a rapid accumulation of phytoene and cessation of carotenoid biosynthesis [31]. In plants, inhibition of *p*-hydroxyphenylpyruvate dioxygenase (HPPD, EC 1.13.11.27) by triketone, isoxazole and pyrazole herbicides affects the formation of homogentisic acid [32], which is a key precursor for the biosynthesis of plastoquinone, a critical cofactor of PDS [26] and leads to inhibition of its enzymatic activity. This class of herbicides represents the last herbicide mode of action to have been commercialized in the last twenty years [33].

Blockage of any of the steps preceding the formation of lycopene inhibits carotenoid synthesis. However, only the herbicide clomazone targets the MEP pathway by inhibiting DXS [34], although it does so indirectly [35]. It has been postulated that, once absorbed into the plant, clomazone is oxidized by cytochrome P450 monooxygenases (P450s) to form ketoclomazone (Figure 2), which is the putative active herbicidal form [34]. Early evidences of this requirement for metabolic activation was observed in plants treated with phorate or other P450s inhibitors being protected from the herbicidal effect of clomazone [36,37]. The antibiotic fosmidomycin is not used as an herbicide, but this compound inhibits DXR, the second step of the MEP pathway [38,39].

The MEP and carotenoid pathways are not present in animals, and thus, their enzymes are preferred targets for new herbicides [40]. In spite of the potential relevance of all other enzymes of this pathway, no herbicide targeting the early steps of carotenoid synthesis, other than clomazone, has been developed [41].

The emergence of resistance to herbicides is an increasing problem facing agriculture [42,43], and there do not appear to be any herbicides with novel mechanisms of action being developed [33]. The pathways leading to carotenoids (MEP and isoprenoid pathways) offer several attractive targets for new molecules discovery efforts [44]. Indeed, the unique target sites inhibited by clomazone [37] and fosmidomycin [45] illustrate the potential benefits of developing new herbicides which interfere with the early steps of carotenoid synthesis.

One approach to discover novel inhibitors has been high throughput *in vitro* assays that are most likely to identify

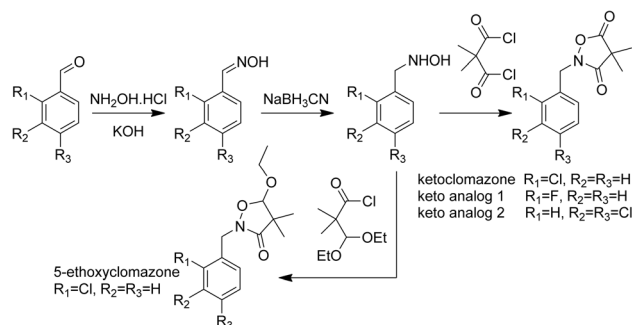

**Figure 2. Schematics of the synthesis of 5-ethoxyclomazone, ketoclomazone and keto analogs 1 and 2.**

doi:10.1371/journal.pone.0103704.g002

mechanism-based inhibitors of the various steps in the MEP pathway [46]. The aim of our research was to develop a simple, fast, and inexpensive, *in vivo* assay to identify inhibitors of the early steps in carotenoid synthesis by measuring the carbon flux through the MEP and isoprenoid pathways using phytoene as a biomarker.

## Materials and Methods

### Chemicals and supplies

Phorate, *O,O*-diethyl *S*-[(ethylthio)methyl] phosphorodithioate; fosmidomycin (3-(formylhydroxyamino)propyl)-phosphonic acid sodium salt; FR-900098, *p*-[3-(acetylhydroxyamino)propyl]-phosphonic acid; amitrol, 1,2,4-triazol-3-amine; dinoterb, 2-(1,1-dimethylethyl)-4,6-dinitro-phenol; endothall monohydrate, 7-oxabicyclo[2.2.1] heptane-2, 3-dicarboxylic acid monohydrate; oryzalin, 4-(dipropylamino)-3,5-dinitro-benzenesulfonamide; sulcotrione, 2-[2-chloro-4-(methylsulfonyl)benzoyl]-1,3-cyclohexanedione were purchased from Sigma-Aldrich (St. Louis, MO 63103) and dichlobenil (2,6-dichlorobenzonitrile); glufosinate-ammonium, 2-amino-4-(hydroxymethylphosphinyl)butyric acid ammonium salt were purchased from Allied-Signal Inc., (Morristown, NJ 07960).

Clomazone, 2-[(2-chlorophenyl)methyl]-4,4-dimethyl-3-isoxazolidinone; imazapyr, 2-[4,5-dihydro-4-methyl-4-(1-methylethyl)-5-oxo-1*H*-imidazol-2-yl]-3-pyridinecarboxylic acid; quinclorac, 3,7-dichloro-8-quinolinecarboxylic acid; atrazine, 6-chloro-*N*2-ethyl-*N*4-(1-methylethyl)-1,3,5-triazine-2,4-diamine; paraquat CL tetrahydrate, 1,1'-dimethyl-4,4'-bipyridinium dichloride; imazethapyr, 2-(4,5-dihydro-4-methyl-4-(1-methylethyl)-5-oxo-1*H*-imidazol-2-yl)-5-ethyl-3-pyridinecarboxylic acid; alachlor, 2-chloro-*N*-(2,6-diethylphenyl)-*N*-(methoxymethyl)-acetamide; asulam, *N*-[(4-aminophenyl)sulfonyl]-carbamic acid methyl ester; sulfentrazone, *N*-[2,4-dichloro-5-[4-(difluoromethyl)-4,5-dihydro-3-methyl-5-oxo-1*H*-1,2,4-triazol-1-yl]-phenyl] methanesulfonamide; glyphosate-isopropylammonium, isopropylammonium *N*-(phosphonomethyl) glycine; diclofop-methyl, 2-[4-(2,4-dichlorophenoxy)phenoxy]-propanoic acid methyl ester were purchased from Chem-Service (West Chester, PA 19381).

Norflurazon, 4-chloro-5-(methylamino)-2-[3-(trifluoromethyl)phenyl]-3(2*H*)-pyridazinone was provided by Sandoz, Inc. Crop Protection (now Syngenta, Greensboro, NC 27419), and experimental inhibitors for some of the enzymes of the MEP pathway were provided by BASF-SE (Ludwigshafen, Germany) [41].

### Synthesis of halogenated analogs

Reagents and solvents were purchased from Sigma-Aldrich Chemical Co. (St Louis, MO, USA) and Fisher Scientific (Pittsburgh, PA, USA). NMR spectra were recorded on a Varian-Mercury-plus-400 or Varian Unity-Inova-600 spectrometer using CDCl<sub>3</sub> and methanol-*d*<sub>4</sub> unless otherwise stated. MS data were obtained from an Agilent Series 1100 SL equipped with an ESI source (Agilent Technologies, Palo Alto, CA, USA). Column chromatography and preparative TLC were performed on Merck silica gel 60 (230–400 mesh) and silica gel GF plates (20×20 cm, thickness 0.25 mm), respectively. General synthesis of 5-ethoxyclozomazone, ketoclozomazone and analogs is shown in Figure 2.

### Synthesis of halogenated-benzaldehyde oximes

Oximes of 2-chloro-, 2-fluoro-, and 3,4-dichlorobenzaldehyde were prepared by the procedure reported by Zamponi et al. [47].

2-Chlorobenzaldehyde oxime: <sup>1</sup>H NMR δ(CDCl<sub>3</sub>): 7.26 (1H, brt, *J* = 7.2 Hz), 7.31 (1H, td, *J* = 7.6, 1.6 Hz), 7.38 (1H, dd, *J* = 8.0, 1.2 Hz), 8.62 (1H, s).

2-Fluorobenzaldehyde oxime: <sup>1</sup>H NMR δ(CDCl<sub>3</sub>): 7.10 (1H, brt, *J* = 9.2 Hz), 7.66 (1H, brt, *J* = 7.6 Hz), 7.37 (1H, brq, *J* = 7.2 Hz), 7.71 (1H, t, *J* = 7.6 Hz), 8.38 (1H, s).

3,4-Dichlorobenzaldehyde oxime: <sup>1</sup>H NMR δ(CDCl<sub>3</sub>): 7.40 (1H, dd, *J* = 8.4, 2.0 Hz), 7.46 (1H, d, *J* = 8.4 Hz), 7.67 (1H, d, *J* = 2.0 Hz), 8.01 (1H, s).

### Synthesis of halogenated *N*-(benzyl)hydroxylamine

A mixture of oxime (500 mg) in glacial acetic acid (10 ml) was treated with sodium cyanoborohydride (NaCNBH<sub>3</sub>) portion wise under stirring while maintaining the temperature below 20°C until the reaction was complete as evidenced by TLC. The reaction mixture was basified with ice-cold NaOH and extracted with ethyl acetate. The organic layer was washed with water, dried and evaporated to afford a white solid. This product was chromatographed over silica gel and eluted with ethyl acetate:hexane 3:7 to yield a pure product which was crystallized from CHCl<sub>2</sub>/hexanes.

*N*-(2-Chlorobenzyl)hydroxylamine: <sup>1</sup>H NMR δ(CDCl<sub>3</sub>): 4.1 (2H, s), 7.21–7.26 (2H, m), 7.35–7.39 (2H, m).

*N*-(2-Fluorobenzyl)hydroxylamine: <sup>1</sup>H NMR δ(CDCl<sub>3</sub>): 4.06 (2H, s, CH<sub>2</sub>), 7.05 (1H, brt, *J* = 8.8 Hz), 7.13 (1H, brt, *J* = 7.2 Hz), 7.27 (1H, brq, *J* = 6.8 Hz), 7.33 (1H, brt, *J* = 7.6 Hz).

*N*-(3,4-Dichlorobenzyl)hydroxylamine (**6**): <sup>1</sup>H NMR δ(CDCl<sub>3</sub>): 3.93 (2H, s), 7.15 (1H, dd, *J* = 8.0, 2.0 Hz), 7.40 (1H, d, *J* = 8.0 Hz), 7.44 (1H, d, *J* = 2.0 Hz).

### Synthesis of halogenated ketoclozomazone

Dimethylmalonyl dichloride (1.25 mM) in CH<sub>2</sub>Cl<sub>2</sub> (1 ml) was slowly added to a solution of hydroxylamine (1 mM) and triethylamine (0.3 ml) in CH<sub>2</sub>Cl<sub>2</sub> (5 ml) at 10°C. After addition was complete, the reaction mixture was stirred for 30 min poured onto ice and extracted with CH<sub>2</sub>Cl<sub>2</sub>. The organic layer was washed with aqueous Na<sub>2</sub>CO<sub>3</sub>, 1 N HCl and saturated aqueous NaCl. The resulting solution was then dried and the gummy product obtained was chromatographed over silica gel. The product was eluted with ethyl acetate:hexane 5:95 and crystallized in CH<sub>2</sub>Cl<sub>2</sub>/hexanes.

Ketoclozomazone: <sup>1</sup>H NMR δ(CDCl<sub>3</sub>): 1.44 (6H, s), 5.05 (2H, s), 7.24–7.31 (2H, m), 7.34 (1H, m), 7.39 (1H, m). <sup>13</sup>C NMR δ(CDCl<sub>3</sub>): 21.4 (CH<sub>3</sub>), 41.9 (C), 47.3 (CH<sub>2</sub>), 127.3 (CH), 130.0 (CH), 130.1 (CH), 130.3 (CH), 131.4 (C), 133.8 (C), 172.1 (C), 173.8 (C); HRESIMS [M+H]<sup>+</sup> *m/z* 254.0600 (calcd for (C<sub>12</sub>H<sub>12</sub>ClNO<sub>3</sub>+H)<sup>+</sup>254.0584).

2-(2-Fluorobenzyl)-4,4-dimethylisoxazolidine-3,5-dione (keto analog **1**): <sup>1</sup>H NMR δ(CDCl<sub>3</sub>): 1.41 (6H, s), 4.98 (2H, s), 7.07 (1H, brt, *J* = 9.2 Hz), 7.13 (1H, brt, *J* = 7.6 Hz), 7.25–7.34 (2H, m). <sup>13</sup>C NMR δ(CDCl<sub>3</sub>): 21.2 (CH<sub>3</sub>), 41.8 (C), 47.3 (CH<sub>2</sub>, *J*<sub>CF</sub> = 4.4 Hz), 115.8 (CH, *J*<sub>CF</sub> = 21.3 Hz), 120.7 (CH, *J*<sub>CF</sub> = 14.0 Hz), 124.5 (CH, *J*<sub>CF</sub> = 3.6 Hz), 130.5 (CH), 130.6 (CH, *J*<sub>CF</sub> = 5.9 Hz), 160.9 (C, *J*<sub>CF</sub> = 248 Hz), 172.4 (C), 173.6 (C); HRESIMS [M+H]<sup>+</sup> *m/z* 237.0811 (calcd for (C<sub>12</sub>H<sub>12</sub>FNO<sub>3</sub>+H)<sup>+</sup>237.0801).

2-(3,4-Dichlorobenzyl)-4,4-dimethylisoxazolidine-3,5-dione (keto analog **2**): <sup>1</sup>H NMR δ(CDCl<sub>3</sub>): 1.40 (6H, s), 4.83 (2H, s), 7.17 (1H, dd, *J* = 8.0, 2.0 Hz), 7.41 (1H, brs), 7.42 (1H, d, *J* = 2 Hz), 7.43 (1H, d, *J* = 8.0 Hz). <sup>13</sup>C NMR δ(CDCl<sub>3</sub>): 21.3 (CH<sub>3</sub>), 42.0 (C), 48.8 (CH<sub>2</sub>), 128.0 (CH), 130.6 (CH), 131.1 (CH), 133.1 (C), 133.2 (C), 134.0 (C), 172.9 (C), 173.5 (C); HRESIMS [M+H]<sup>+</sup> *m/z* 288.0207 (calcd for (C<sub>12</sub>H<sub>11</sub>Cl<sub>2</sub>NO<sub>3</sub>+H)<sup>+</sup>288.0194).

### Synthesis of 5-ethoxyclozomazone

A mixture of ethyl 3,3-diethoxy-2,2-dimethylpropionate [48] and KOH (2.2 g) in 10% aqueous ethanol (40 ml) was refluxed for 2 hours and the solvent was evaporated under vacuum. The

residue was dissolved in water (40 ml), neutralized with succinic acid and extracted with  $\text{CH}_2\text{Cl}_2$ . The organic layer was washed with saturated aqueous NaCl, dried over anhydrous  $\text{Na}_2\text{SO}_4$ , and evaporated to give 3-diethoxy-2-dimethylpropanoic acid as a thick oil. Upon storage at 4°C this oil formed a white crystalline solid.

<sup>1</sup>H-NMR (400 MHz)  $\delta$  1.17 (6H, s,  $\text{CH}_3$ ), 1.17 (3H, t,  $J = 7.0$  Hz,  $\text{CH}_3$ ), 3.55 (2H, dq,  $J = 16.0, 7.2$  Hz,  $\text{CH}_2$ ), 3.82 (2H, dq,  $J = 16.0, 7.2$  Hz,  $\text{CH}_2$ ), 4.54 (1H, s, CH); <sup>13</sup>C-NMR (100 MHz)  $\delta$  15.3 ( $\text{CH}_3$ ), 19.6 ( $\text{CH}_3$ ), 48.4 (C), 66.5 ( $\text{CH}_2$ ), 107.3 (CH), 181.9 (CO); HRESIMS  $[\text{M}+\text{Na}]^+$   $m/z$  213.1099 (calcd for  $(\text{C}_9\text{H}_{18}\text{O}_4+\text{Na})^+$  213.1103).

Oxalyl chloride (260 mg, 4 mm) was added to a solution of 3-diethoxy-2-dimethylpropanoic acid (380 mg) in toluene (3 ml) and the reaction mixture was stirred at 60°C for 30 minutes. The solvent was evaporated under vacuum to afford oil. This oil was dissolved in toluene 5 ml and evaporated under vacuum. This product was used in the next reaction immediately without further purification.

Triethylamine (0.5 ml) and 2-chloro-*N*-hydroxybenzylamine (200 mg 1.27 mm) were added sequentially to a solution of 3-diethoxy-2-dimethylpropanoic acid chloride (2 mm) in  $\text{CH}_2\text{Cl}_2$  (4 ml) at 0°C under stirring. The reaction mixture was stirred overnight at room temperature and partitioned between water and  $\text{CH}_2\text{Cl}_2$ . The organic layer was washed with water, dried over  $\text{Na}_2\text{SO}_4$ , and evaporated. The products were chromatographed on silica gel and elution with ethyl acetate/hexane (1:99) gave the least polar product, 5-ethoxyclozomazone, as a colorless oil (32 mg).

<sup>1</sup>H-NMR (400 MHz)  $\delta$  1.06 (3H, t,  $J = 7.2$  Hz,  $\text{CH}_3$ ), 1.16 (3H, s,  $\text{CH}_3$ ), 1.16 (3H, s,  $\text{CH}_3$ ), 1.24 (3H, s,  $\text{CH}_3$ ), 3.38 (1H, dq,  $J = 16.0, 7.2$  Hz, CH) 3.53 (1H, dq,  $J = 16.0, 7.2$  Hz, CH), 4.73 (1H, d,  $J = 16.8$  Hz,  $\text{CH}_2$ ), 4.83 (1H, s, CH), 4.73 (1H, d,  $J = 16.8$  Hz, CH), 4.89 (1H, d,  $J = 16.8$  Hz, CH), 7.16–7.25 (2H, m, CH), 7.29–7.35 (2H, m, CH); <sup>13</sup>C-NMR (100 MHz)  $\delta$  14.8 ( $\text{CH}_3$ ), 16.6 ( $\text{CH}_3$ ), 22.4 ( $\text{CH}_3$ ), 46.1 ( $\text{CH}_2$ ), 46.3 (C), 64.1 ( $\text{CH}_2$ ), 108.0 (CH), 126.8 (CH), 129.0 (CH), 129.2 (CH), 129.4 (CH), 132.9 (C), 133.2 (C), 172.8 (CO); HRESIMS  $[\text{M}+\text{H}]^+$   $m/z$  283.0969 (calcd for  $(\text{C}_{14}\text{H}_{18}\text{ClNO}_3+\text{H})^+$  283.0975).

## Plant material

Barley (*Hordeum vulgare* L.) seeds were purchased from Johnny's Selected Seeds (Waterville, Maine 04903). Seeds were sown in moist commercial Metromix potting soil and grown either in a dark growth chamber set at 25°C or in the greenhouse under natural light for 4 days.

## Bioassays

Approximately 0.1 g of fresh young barley leaves were weighed, cut in 3 mm sections with a razor blade, and incubated (60 × 15 mm Petri dishes) in 5 ml of 5 mM 2-[*N*-morpholino]ethanesulfonic acid buffer (MES, pH 6.5) containing 200 μM of norflurazon for 24 h in a growth chamber with the 16/8 light/dark cycle at 25°C. The herbicides and other test compounds (see section *Chemicals and Supplies*) were tested either at a fixed concentration or at different concentrations (dose-response curves ranged from 0.1 to 100 μM inhibitor in acetone). Control tissues were exposed to the same amount of acetone as the treated tissues but without the test compounds. All experiments had 3–5 replicates and were repeated in time. The effect of 50 μM phorate, a cytochrome P450 monooxygenase inhibitor, was tested in some of the assays with clozomazone to determine the requirement for the metabolic activation of this herbicide.

The usefulness of this bioassay in identifying potential novel inhibitors of the early steps of carotenoid biosynthesis was tested

with a number of experimental compounds provided by BASF or synthesized in our laboratory. These compounds were tested at a 100 μM final concentration on greening etiolated barley leaf cuttings and their activity is expressed as inhibition of phytoene accumulation relative to the amount of phytoene accumulating in the norflurazon alone treatment. Finally, the specificity of this assay was evaluated by testing representative compounds inhibiting all the known target sites of commercial herbicides. These compounds were tested at a 100 μM final concentration on etiolated barley leaf cutting either exposed to light or maintained in total darkness for 24 h. Herbicides causing a 10% or less reduction of phytoene level were considered not active. Those causing 10 to 50% inhibition and those causing more than 50% inhibition were considered slightly and highly active, respectively.

## Phytoene extraction and determination

Phytoene was extracted and quantified according to a protocol modified from Sprecher et al. [49] as described in Dayan et al. [50]. After 24 h incubation, the barley leaf samples were homogenized (Polytron, PT 3300) in 3 ml of 6% KOH in methanol (w/v), stored for 15 min at room temperature (RT) and then centrifuged for 5 min at 1,300 *g* (Sorvall Swinging Bucket SH-3000 rotor). The supernatant was transferred into new tubes and mixed with 3 ml of petroleum ether (Acros, Fair Lawn, NJ, boiling range 80–110°C). Saturated NaCl solution was added (1.5 ml), mixed and centrifuged for 10 min at 1,300 *g*. A clear partition is formed by centrifugation and an aliquot (1.250 ml) of the epiphase was transferred to disposable cuvettes (methacrylate) followed by UV-spectrophotometric (Shimadzu, UV-3101PC) measurements at 287 nm. All manipulations were performed in a dark room under green light. The phytoene content was calculated by its extinction coefficient ( $\epsilon$ ) of 1108 mM  $\text{cm}^{-1}$  and expressed as  $\mu\text{g g}^{-1}$  fresh weight (FW) according to equation 1:

$$\mu\text{g g}^{-1} \text{FW} = \frac{(\text{A}/\epsilon) \times 0.03}{\text{gFW}} 10^6 \quad (1)$$

## Statistical Analysis

Phytoene accumulation was plotted against inhibitor concentrations to generate dose-response curves. Data were analyzed by a four-parameters log-logistic model [51] using R software (version 2.15.2, R Foundation for Statistical Computing, Vienna, Austria) with the drc module [52]. Means and standard deviations were obtained using the raw data and the half-maximal inhibitory response ( $I_{50}$ ) was defined as the concentration at which this accumulation was inhibited by 50% compared with controls.  $I_{50}$  values were obtained from the parameters in the regression curves. Graphs were generated with Sigma Plot (version 11, Systat Software Inc., San Jose, CA, USA). Means were separated with the Duncan multiple range test at  $P = 0.05$  using the Agricolae module [53].

The quality of the assay was determined by calculating the  $Z'$  factor using equation 2 according to Zhang et al. [54]

$$Z' = 1 \frac{(3\sigma_{c+} + 3\sigma_{c-})}{|\mu_{c+} - \mu_{c-}|} \quad (2)$$

where  $3\sigma_{c+} = 3$  standard deviations of positive control,  $3\sigma_{c-} = 3$  standard deviations of negative control,  $\mu_{c+}$  = mean of positive control and  $\mu_{c-}$  = mean of negative control. The utilization of the 3 standard deviations ensures 99.73% confidence limit. The  $Z'$  of

the phytoene accumulation assay is based on the measurements of 33 positive controls and 33 negative controls.

## Results and Discussion

### Accumulation of phytoene over time

This simple assay relies on the premise that the accumulation of phytoene resulting from the inhibition of phytoene desaturase by norflurazon is a reflection of the carbon flow through the MEP pathway. Incubation of barley leaves floating on a medium supplemented with 200  $\mu\text{M}$  norflurazon for 24 h caused a time-dependent linear accumulation of phytoene (Figure 3). Therefore, any compound reducing the level of phytoene accumulation during this assay is likely to inhibit one of the many enzymatic steps leading to phytoene synthesis (Figure 1). It has been suggested that inhibiting the MEP pathway of plants could be useful in the search of novel herbicides [55] and the bioassay described herein may be a useful new tool to discover such compounds.

Barley was selected because its small seeds germinate quickly in the dark and contain highly active MEP and carotenoid pathways during its light-induced thylakoid formation, in the transition of etioplasts to chloroplasts during the greening process [56]. Additionally, it is highly sensitive to clomazone [57], which is important because some plants do not metabolize clomazone to ketoclomazone (the putative active form) very rapidly, and their inhibitory effects may not be detected during the time-span of this experiment.

### Effect of clomazone, ketoclomazone, and 5-ethoxyclomazone

Clomazone is the only commercial herbicide known to inhibit carotenoid synthesis upstream from phytoene desaturase. Actually, clomazone is inactive, but its metabolite ketoclomazone inhibits DXS [34,56], the thiamine diphosphate-dependent enzyme that catalyzes the first step in the MEP pathway [58].

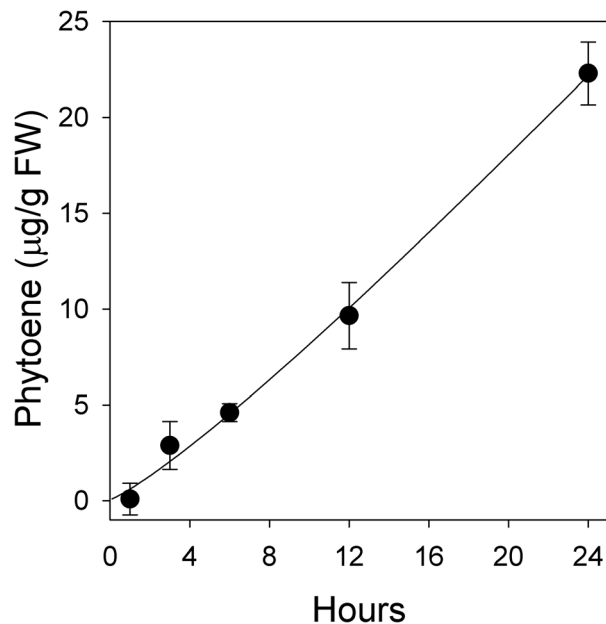

**Figure 3. Time-dependent phytoene accumulation in barley (*Hordeum vulgare* L.) exposed to 200  $\mu\text{M}$  norflurazon.** Data represent means of three replications with standard deviation. doi:10.1371/journal.pone.0103704.g003

In our simple barley leaf cutting assay, clomazone inhibited phytoene accumulation in a dose-dependent manner that illustrates the inhibition of carbon flow into the MEP pathway in both green (Figure 4A) and greening etiolated tissues (Figure 4B). Clomazone had an  $I_{50}$  for inhibition of phytoene accumulation of  $0.6 \pm 0.16$  and  $0.33 \pm 0.05$   $\mu\text{M}$  in green and greening tissues, respectively. Sandmann and Böger [30] reported an  $I_{50}$  value for clomazone of less than 15  $\mu\text{M}$  for inhibition of phytoene and phytol biosynthesis in spinach extracts, suggesting that our *in vivo* assay may be more sensitive as it allows for the metabolic activation of clomazone [36,37].

The requirement for metabolic activation of clomazone was confirmed by repeating the same dose-response curves in the presence of 50  $\mu\text{M}$  phorate. Phorate is an organophosphate insecticide that inhibits cytochrome P450 monooxygenases in plants [59]. In some species, clomazone is rapidly metabolized by P450s [60–62] and phorate can protect plants against the

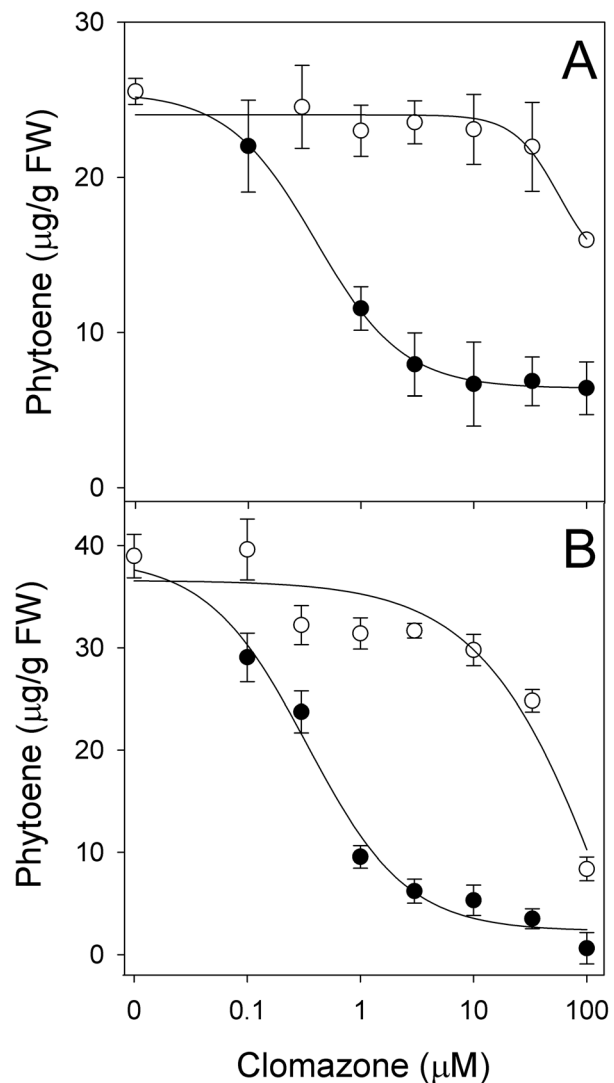

**Figure 4. Dose-response curves showing the effect of the herbicide clomazone with (○) and without (●) phorate on phytoene accumulation induced by 200  $\mu\text{M}$  norflurazon.** (A) Green and (B) greening etiolated young barley leaves. Data represent means of three replications with standard deviation. doi:10.1371/journal.pone.0103704.g004

phytotoxic effect of clomazone by preventing this metabolic activation [36,63].

The addition of 50  $\mu\text{M}$  phorate to the solution prevented clomazone from inhibiting phytoene accumulation in both green and greening etiolated, with  $I_{50} > 100 \mu\text{M}$  (Figures 4 A and B). These results are consistent with previous studies indicating that clomazone must be metabolically activated by P450s and that phorate can abolish its herbicidal activity [36,63].

In plants, metabolism of clomazone follows a couple of pathways. One route involves a *N*-dealkylation step yielding 2-chlorobenzyl alcohol. The other route follows the progressive oxidation of carbon 5 to yield 5-hydroxyclozomazone and ultimately ketoclozomazone [60,62]. In both of these studies, 5-hydroxyclozomazone and ketoclozomazone were present in equivalent amounts, suggesting that the conversion of clomazone to ketoclozomazone is not instantaneous. While ketoclozomazone has been proposed as the active form responsible for the herbicidal activity of clomazone [34,56], early work on the development of clomazone by FMC (Philadelphia, PA USA) also reported that 5-hydroxyclozomazone and several 5-alkoxy derivatives were also potent herbicides [64]. It is postulated that all these 5-hydroxy derivatives are further metabolized into ketoclozomazone.

When tested in our bioassay, 5-ethoxyclozomazone was as active as clomazone, and phorate did not negatively affect that activity (Figure 5A). Although still very active, ketoclozomazone was 16 times less active in greening tissues than clomazone, with  $I_{50}$  values of 5  $\mu\text{M}$  (Figure 5B). This was unexpected since clomazone is a proherbicide and appears to be bioactivated by P450s (Figure 4). Phorate did not affect the activity of ketoclozomazone, suggesting that it is not subject to further oxidation by P450s (Figure 5B). Similar results were obtained in green tissues (Figure S1).

From a metabolic perspective, the pattern observed with clomazone, 5-ethoxyclozomazone and ketoclozomazone, and the effect of phorate on the activity of these compounds is particularly informative. Clomazone is a potent *in vivo* inhibitor of phytoene accumulation but phorate greatly reduces this activity, confirming that clomazone is not herbicidal and that one of its oxidized metabolites must be very active, causing inhibition of the carbon flow at submicromolar concentrations. 5-Ethoxyclozomazone is as active as the commercial herbicide. On the other hand, the activity of ketoclozomazone was lower than that of clomazone, and phorate had no effect on the herbicidal activity of ketoclozomazone, suggesting that either the uptake of ketoclozomazone was limiting, or that another intermediate is the active form of the herbicide.

Clomazone, 5-hydroxyclozomazone and a series of acylated 5-hydroxy derivatives do not inhibit purified plant DXS, whereas ketoclozomazone is highly active, with an  $I_{50}$  value of 80 nM [41]. Additionally, the *seco*-ketoclozomazone analog with a 3-[methyl(hydroxy)amino]-2,2-dimethyl-3-oxopropanoic acid side chain, which is a known plant metabolite of clomazone [60,62], was recently reported as a potent inhibitor of *Haemophilus influenzae* DXS [65]. Analysis of the structure-activity relationship of the compounds tested in that study highlighted the requirement for the hydroxamate, the 2,2-dimethylmethylidene, and the carboxylic functional groups. While this *seco*-ketoclozomazone analog has structural features reminiscent of a putative transition state intermediate analog, neither the exact form of the clomazone pharmacophore responsible for inhibition of DXS nor its binding to the enzyme is known.

#### Validity of the bioassay with inhibitors of early steps of the MEP pathway

Keto analogs **1** and **2** are structurally related to ketoclozomazone with simple changes in the halogen substitutions on the phenyl

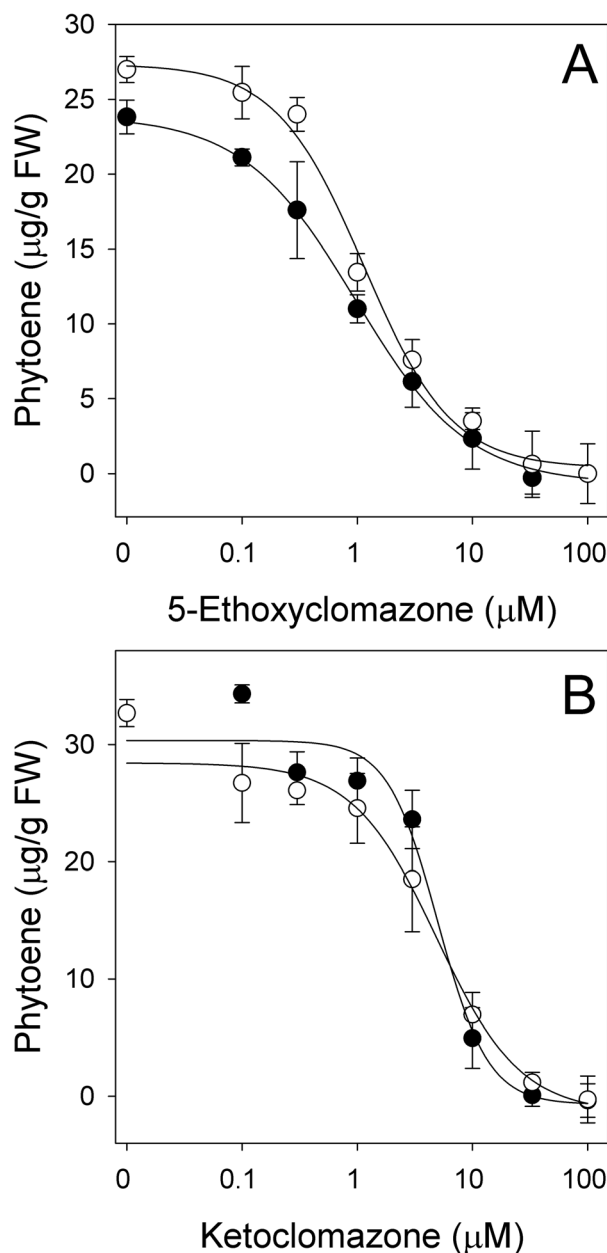

**Figure 5. Dose-response curves of (A) 5-ethoxyclozomazone and (B) ketoclozomazone with (○) and without (●) phorate on greening etiolated barley leaves.** Phytoene was caused to accumulate by the presence of 200  $\mu\text{M}$  norflurazon. Data represent means of three replications with standard deviation. doi:10.1371/journal.pone.0103704.g005

ring (Figure 2). In this study, keto analog **1** was a weak inhibitor of phytoene accumulation, with an  $I_{50}$  value of 22  $\mu\text{M}$  on greening etiolated tissue (Figure S2A). Its activity on green tissue was even lower, with an  $I_{50}$  value of 52  $\mu\text{M}$  (Figure S2B). However, the structural similarity between ketoclozomazone and keto analog **1** suggests that this new compound may inhibit DXS. Keto analog **2** did not affect phytoene accumulation (data not shown), suggesting that the position of the halogen on the phenyl ring has a significant effect on the activity of ketoclozomazone.

The first compound described to inhibit the MEP pathway was fosmidomycin, also known as FR-31564 and 3-(*N*-formyl-*N*-hydroxyamino) propylphosphonic acid [66,67]. This compound prevents

the conversion of labeled DOXP into carotenoids in the *Capsicum* chromoplast system [68] by inhibiting DXR (Figure 1) [66]. Since then, a considerable number of fosmidomycin derivatives have been synthesized to identify new DXR inhibitors [69,70].

In our study, fosmidomycin and its structural analog FR-900098 inhibited phytoene accumulation in a dose-dependent manner with  $I_{50}$  values of 5 and 5.5  $\mu\text{M}$  for greening etiolated, respectively (Figure 6). Similar activity was observed on green barley leaves, with  $I_{50}$  values of 11 and 17.5  $\mu\text{M}$  for fosmidomycin and FR-900098, respectively (Figure S3).

Interest in inhibitors of the MEP pathway has led a research group at BASF-SE (Ludwigshafen, Germany) to screen for new herbicides targeting this pathway in target-based high throughput *in vitro* assays [41]. Eleven of these experimental compounds were tested in our *in vivo* bioassay.

None of these compounds were very active in our *in vivo* bioassay (Table 1). The most active cluster were **BASF 11** and **BASF 12**, the azolopyrimidine inhibitors of 2C-methyl-D-erythritol 4-phosphate cytidyltransferase (IspD), the third step on the MEP pathway (Figure 1), with 63.6% and 61.3% inhibition of phytoene accumulation, respectively (Table 1). Interestingly, these compounds were the most potent MEP inhibitors generated by BASF with *in vitro*  $I_{50}$  values against IspD activity at 140 nM and 35 nM, respectively [41]. IspD activity has been validated by antisense experiments to be essential to plant survival and inhibitors of this enzyme were anticipated to be potentially herbicidal [71,72]. All of the other BASF compounds, including the putative inhibitors of 4-diphosphocytidyl-2C-methyl-D-erythritol kinase (ispE), had *in vitro* activity in the micromolar range [41] and were not very active in the barley bioassay (Table 1). The difference between the activity reported on the target sites and in the barley leaf bioassay may be due to a number of factors. There is often no correlation between the *in vitro* activity of experimental compounds and their performance as herbicides *in vivo* because their physicochemical properties may be less than ideal for uptake

and translocation [33]. Metabolic degradation of the compounds may also play a role.

### Selectivity of the bioassay

Herbicides have unique affinities for their respective molecular target sites within important plant biochemical pathways and/or physiological processes [35,73]. To test the selectivity of the bioassay to identify inhibitors of the early steps of carotenoid synthesis, herbicides representative of all known modes of action were selected to survey their effects on phytoene accumulation (Table 2). All of the compounds were tested at 100  $\mu\text{M}$  to determine whether they would be detected as false positives in a screening program.

Most of the herbicides targeting enzymes in pathways unrelated to carotenoid synthesis had either little or no effect on the carbon flow into phytoene (-/+). The slight inhibition caused by glyphosate may be a reflection of the secondary effect of this herbicide on the carotenoid pathway. Studies to understand the mechanism of vacuolar sequestration involved in resistance to glyphosate revealed that 2-C-methyl-D-erythritol-2,4-cyclopyrophosphate, the last intermediate in the MEP pathway, accumulated in the presence of this herbicide [74,75].

Activities of a large number of herbicide families are directly or indirectly influenced by light. Herbicide mechanisms that are light-dependent or enhanced by light fall into several different categories [76]. Herbicides with the strongest indirect inhibitory effects (++) on phytoene accumulation were those generating reactive oxygen species (ROS) that lead to lipid peroxidation via light-dependent processes (e.g., inhibitors of PPO, electron diverters from photosystem I) (Table 2). This effect is most likely due to membrane degradation affecting all the biochemical process in the damaged tissues. In most cases, this interference could be alleviated by performing the assays in the dark.

To explore the impact of oxidative stress on the expression of MEP-pathway enzymes, Chang [12] exposed *Catharanthus roseus* leaf discs to a 0.5  $\mu\text{M}$  paraquat solution. This treatment resulted in the bleaching within 10 h of exposure, whereas control treatment did not show any bleaching over a 30 h period. The paraquat treatment also caused a strong induction of *DXS* transcripts, suggesting deregulation of the MEP pathway.

The precise relationship between the effect of the herbicide dinoterb, a synthetic phenol that is no longer used as a herbicide, on phytoene accumulation and its mechanism of action is not well understood but this compound is a strong generator of ROS that destabilizes membranes under both light and dark conditions. Dinoterb also uncouples oxidative phosphorylation, which may reduce the endogenous levels of ATP, thereby inhibiting some of the steps in the MEP pathway (Figure 1). Endothall, an inhibitor of serine/threonine protein phosphatases, also caused a reduction of phytoene accumulation under both light and dark conditions, but the biochemical basis for this effect is unknown.

### Conclusions

The simple *in vivo* bioassay developed in this study proved to be an efficient and inexpensive screening method for putative novel inhibitors of the MEP and terpenoid pathways preceding carotenoid synthesis. The method permitted determination of carbon flow through this pathway with accuracy, reproducibility, and minimal sample consumption. The assay appears to be robust in terms of detecting the inhibitory activity of compounds that target the early steps of carotenoid synthesis. The quality of an assay is most commonly assessed by calculating the  $Z'$  factor [77]. It is generally accepted that assays with  $0.5 < Z' < 1$  have good separation of the

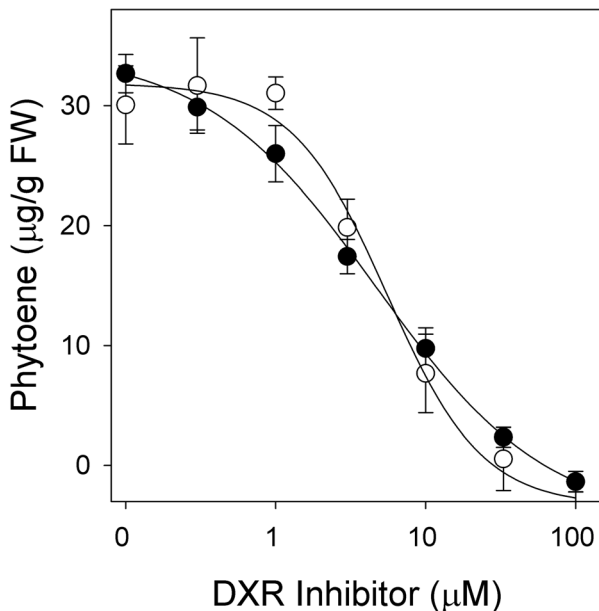

**Figure 6. Dose-response curves of the DXR inhibitors fosmidomycin (●) and FR-900098 (○) on greening etiolated barley leaves.** Phytoene accumulation was induced in the presence of 200  $\mu\text{M}$  norflurazon. Data represent means of three replications with standard deviation.

doi:10.1371/journal.pone.0103704.g006

**Table 1.** Effect of BASF experimental compounds on phytoene accumulation in the presence of 200  $\mu$ M norflurazon.

| MEP target site                                       | BASF           | Inhibition <sup>b</sup> |     |
|-------------------------------------------------------|----------------|-------------------------|-----|
|                                                       | # <sup>a</sup> | (%)                     |     |
| DXS                                                   |                |                         |     |
| 1-Deoxyxylulose-5-phosphate synthase                  | 3              | 11.1                    | BC  |
|                                                       | 4              | 15.6                    | BC  |
|                                                       | 5              | 27.2                    | CD  |
|                                                       | 6              | 44.4                    | DE  |
| DXR                                                   |                |                         |     |
| 1-Deoxyxylulose-5-phosphate reductoisomerase          | 7              | (117.7) <sup>c</sup>    | A   |
|                                                       | 8              | 40.3                    | DE  |
| IspD                                                  |                |                         |     |
| 2C-Methyl-D-erythritol 4-phosphate cytidyltransferase | 9              | 20.6                    | BCD |
|                                                       | 10             | 26.0                    | CD  |
|                                                       | 11             | 63.6                    | E   |
|                                                       | 12             | 61.3                    | E   |
| IspE                                                  |                |                         |     |
| 4-Diphosphocytidyl-2C-methyl-D-erythritol kinase      | 13             | 28.8                    | CD  |

Inhibition of phytoene accumulation by compound treatment was expressed in percentage of inhibition related to maximum accumulation in control assays. All compounds were tested at 100  $\mu$ M.

<sup>a</sup>Numbering corresponds to structures in Witschel et al. (2013) [41].

<sup>b</sup>Means values followed by the same letter do not differ significantly at the 5% level by Duncan's multiple range test.

<sup>c</sup>Caused greater phytoene accumulation.

doi:10.1371/journal.pone.0103704.t001

**Table 2.** Effect of herbicides with different modes of action on phytoene accumulation in the presence of 200  $\mu$ M norflurazon.

| WSSA | Compound <sup>a</sup> | MOA                                         | Inhibition <sup>b</sup> |      |
|------|-----------------------|---------------------------------------------|-------------------------|------|
|      |                       |                                             | Light                   | Dark |
| A    | Diclofop              | Acetyl-CoA carboxylase                      | +                       | -    |
| B    | Imazethapyr           | Acetolactate synthase                       | -                       | -    |
| C1   | Atrazine              | Photosystem II                              | -                       | -    |
| D    | Paraquat              | Photosystem I electron diverter             | ++                      | -    |
| E    | Sulfentrazone         | Protoporphyrinogen oxidase                  | ++                      | +    |
| F2   | Sulcotrione           | <i>p</i> -Hydroxyphenylpyruvate dioxygenase | +                       | -    |
| F4   | Clomazone             | Deoxyxylulose-5-phosphate synthase          | ++                      | ++   |
| G    | Glyphosate            | Enolpyruvylshikimate synthase               | +                       | -    |
| H    | Glufosinate           | Glutamine synthetase                        | -                       | -    |
| I    | Asulam                | Dihydropteroate synthase                    | +                       | -    |
| K1   | Oryzalin              | Tubulin                                     | -                       | -    |
| K3   | Alachlor              | Very long chain fatty acid elongases        | -                       | -    |
| L    | Dichlobenil           | Cellulose synthase                          | -                       | -    |
| M    | Dinoterb              | Oxidative phosphorylation uncoupler         | ++                      | ++   |
| NC   | Endothall             | Serine/threonine protein phosphatase        | ++                      | +    |
| O    | Quinclorac            | Synthetic auxin                             | -                       | -    |

The bioassay was performed in three replications of each treatment.

<sup>a</sup>All compounds were tested at 100  $\mu$ M to determine whether they would be detected as false positives in a high throughput screening program.

<sup>b</sup>no inhibition (0–10%) (-), slight inhibition (10 to 50%) (+) and strong inhibition (50 to 100%) (++)

doi:10.1371/journal.pone.0103704.t002



distributions and are excellent assays. The assay developed in this study has a  $Z'$  factor of 0.584 (Figure S4), which indicates that it is likely to successfully identify active compounds [54]. Additionally, it would easily complement enzyme-based high-throughput screenings and evaluate the *in vivo* activity potential performance of inhibitors identified in the *in vitro* assay, without requiring greenhouse tests. The sensitivity of the bioassay to compounds producing reactive oxygen species may be a limitation.

## Supporting Information

**Figure S1 Dose-response curves of ketoclozazole (a clomazone metabolite) with (○) and without (●) phorate in green barley leaves.** Phytoene was caused to accumulate by the presence of 200  $\mu$ M norflurazon. Data represent means of three replications with standard deviation. (DOC)

**Figure S2 Dose-response to the keto analog 1 on greening etiolated (A) and green (B) young barley leaves (●).** Data represent means of three replications with standard deviation. (DOC)

## References

- Vranová E, Coman D, Grussem W (2013) Network analysis of the MVA and MEP pathways for isoprenoid synthesis. *Ann Rev Plant Biol* 64: 665–700.
- Croteau RB, Kutchan TM, Lewis NG (2000) Natural products (secondary metabolites). In: Buchanan BB, Grussem W, Jones RL, editors. *Biochemistry and Molecular Biology of Plants*. Rockville, MD: American Society of Plant Biologists. pp. 1250–1268.
- Cordoba E, Porta H, Arroyo A, San Román C, Medina L, et al. (2011) Functional characterization of the three genes encoding 1-deoxy-D-xylulose 5-phosphate synthase in maize. *J Exp Bot* 62: 2023–2038.
- Bartley GE, Scolnik PA (1995) Plant carotenoids: Pigments for photoprotection, visual attraction, and human health. *Plant Cell* 7: 1027–1038.
- DellaPenna D, Pogson BJ (2006) Vitamin synthesis in plants: Tocopherols and carotenoids. *Ann Rev Plant Biol* 57: 711–738.
- Botella-Pavía P, Besumbes Ó, Phillips MA, Carretero-Paulet L, Boronat A, et al. (2004) Regulation of carotenoid biosynthesis in plants: evidence for a key role of hydroxymethylbutenyl diphosphate reductase in controlling the supply of plastidial isoprenoid precursors. *Plant J* 40: 188–199.
- Malkin R, Niyogi K (2000) Photosynthesis. In: Buchanan BB, Grussem W, Jones RL, editors. *Biochemistry and Molecular Biology of Plants*. Rockville, MD: American Society of Plant Biologists. pp. 568–628.
- Lichtenthaler HK (2010) The non-mevalonate DOXP/MEP (deoxyxylulose 5-phosphate/methylerythritol 4-phosphate) pathway of chloroplast isoprenoid and pigment biosynthesis. In: Rebeiz CA, Benning C, Bohnert HJ, Daniell H, Hooper JK et al., editors. *The Chloroplast: Basics and Applications*: Springer Science+Business Media B.V. pp. 95–118.
- Lichtenthaler HK, Rohmer M, Schwender J (1997) Two independent biochemical pathways for isopentenyl diphosphate and isoprenoid biosynthesis in higher plants. *Physiol Plant* 101: 643–652.
- Lichtenthaler HK (2000) Sterols and isoprenoids: Non-mevalonate isoprenoid biosynthesis: enzymes, genes and inhibitors. *Biochem Soc Trans* 28: 785–789.
- Cunningham FX Jr., Gantt E (1998) Genes and enzymes of carotenoid biosynthesis in plants. *Ann Rev Plant Physiol Plant Mol Biol* 49: 557–583.
- Chang W-C, Song H, Liu H-W, Liu P (2013) Current development in isoprenoid precursor biosynthesis and regulation. *Curr Opin Chem Biol* 17: 571–579.
- Weimer MR, Balke NE, Buhler DD (1992) Herbicide clomazone does not inhibit *in vitro* geranylgeranyl synthesis from mevalonate. *Plant Physiol* 1992: 427–432.
- Duke SO, Paul RN, Becerril JM, Schmidt JH (1991) Clomazone causes accumulation of sesquiterpenoids in cotton (*Gossypium hirsutum* L.). *Weed Sci* 39: 339–346.
- Croteau RB (1992) Clomazone does not inhibit the conversion of isopentenyl pyrophosphate to geranyl, farnesyl, or geranylgeranyl pyrophosphate *in vitro*. *Plant Physiol* 98: 1515–1517.
- Rohmer M (1999) The discovery of a mevalonate-independent pathway for isoprenoid biosynthesis in bacteria, algae and higher plants. *Nat Prod Rep* 16: 565–574.
- Eisenreich W, Bacher A, Arigoni D, Rohdich F (2004) Biosynthesis of isoprenoids via the non-mevalonate pathway. *Cell Mol Life Sci* 61: 1401–1426.
- Lichtenthaler HK, Schwender J, Disch A, Rohmer M (1997) Biosynthesis of isoprenoids in higher plant chloroplasts proceeds via a mevalonate-independent pathway. *FEBS Lett* 400: 271–274.

**Figure S3 Dose-response curves of the DXR inhibitors fosmidomycin (○) and FR-900098 (●) on green young barley leaves.** Phytoene accumulation was induced in the presence of 200  $\mu$ M norflurazon. Data represent means of three replications with standard deviation. (DOC)

**Figure S4 Calculation of the  $Z'$  factor of the bioassay.** (DOCX)

## Acknowledgments

We are grateful to J'Lynn Howell, Susan B. Watson and Robert Johnson for their excellent technical assistance. We also thank BASF-SE (Ludwigshafen, Germany) for providing their experimental compounds.

## Author Contributions

Conceived and designed the experiments: FED NC. Performed the experiments: NC FMLS NPDN FED. Analyzed the data: NC MW EDV FED. Contributed reagents/materials/analysis tools: MW FED. Contributed to the writing of the manuscript: NC MW FED.

- Schwender J, Zeidler J, Groner R, Müller C, Focke M, et al. (1997) Incorporation of 1-deoxy-D-xylulose into isoprene and phytol by higher plants and algae. *FEBS Lett* 414: 129–134.
- Schuh C, Radykewicz T, Sagner S, Latzel C, Zenk M, et al. (2003) Quantitative assessment of crosstalk between the two isoprenoid biosynthesis pathways in plants by NMR spectroscopy. *Phytochem Rev* 2: 3–16.
- Laule O, Fürholz A, Chang H-S, Zhu T, Wang X, et al. (2003) Crosstalk between cytosolic and plastidial pathways of isoprenoid biosynthesis in *Arabidopsis thaliana*. *Proc Natl Acad Sci USA* 100: 6866–6871.
- Lichtenthaler HK (1999) The 1-deoxy-D-xylulose-5-phosphate pathway of isoprenoid biosynthesis in plants. *Ann Rev Plant Physiol Plant Mol Biol* 50: 47–65.
- Gong YF, Liao ZH, Guo BH, Sun XF, Tang KX (2006) Molecular cloning and expression profile analysis of *Ginkgo biloba* DXS gene encoding 1-deoxy-D-xylulose 5-phosphate synthase, the first committed enzyme of the 2-C-methyl-D-erythritol 4-phosphate pathway. *Planta Med* 72: 329–355.
- Cordoba E, Salmi M, León P (2009) Unravelling the regulatory mechanisms that modulate the MEP pathway in higher plants. *J Exp Bot* 60: 2933–2943.
- Koyama T, Ogura K (1999) Isopentenyl diphosphate isomerase and prenyltransferases. In: Cane DE, editor. *Comprehensive Natural Products Chemistry: Isoprenoids Including Carotenoids and Steroids*. Oxford: Pergamon Press. pp. 69–96.
- Norris SR, Barrette TR, DellaPenna D (1995) Genetic dissection of carotenoid synthesis in *Arabidopsis* defines plastoquinone as an essential component of phytoene desaturation. *Plant Cell* 7: 2139–2149.
- Carol P, Stevenson D, Bisanz C, Breitenbach J, Sandmann G, et al. (1999) Mutations in the *Arabidopsis* gene IMMUTANS cause a variegated phenotype by inactivating a chloroplast terminal oxidase associated with phytoene desaturation. *Plant Cell* 11: 57–68.
- Duke SO, Kenyon WH, Paul RN (1985) FMC 57020 effects on chloroplast development in pitted morningglory (*Ipomoea lacunosa*) cotyledons. *Weed Sci* 33: 786–794.
- Dayan FE, Duke SO (2003) Herbicides: Carotenoid biosynthesis inhibitors. In: Plimmer JR, Gammon DW, Ragsdale NN, editors. *Encyclopedia of Agrochemicals*. New York, NY: John Wiley & Sons. pp. 744–749.
- Sandmann G, Böger P (1989) Inhibition of carotenoid biosynthesis by herbicides. In: Sandmann G, Böger P, editors. *Target Sites of Herbicide Action*. Boca Raton, FL: CRC Press. pp. 25–44.
- Weinberg T, Lalazar A, Rubin B (2003) Effects of bleaching herbicides on field dodder (*Cuscuta campestris*). *Weed Sci* 51: 663–670.
- Lee DL, Prisbylla MP, Cromartie TH, Dagarin DP, Howard SW, et al. (1997) The discovery and structural requirements of inhibitors of *p*-hydroxyphenylpyruvate dioxygenase. *Weed Sci* 45: 601–609.
- Duke SO (2012) Why have no new herbicide modes of action appeared in recent years? *Pest Manag Sci* 68: 505–512.
- Müller C, Schwender J, Zeidler J, Lichtenthaler HK (2000) Properties and inhibition of the first two enzymes of the non-mevalonate pathway of isoprenoid biosynthesis. *Biochem Soc Trans* 28: 792–793.
- Dayan FE, Duke SO, Grossmann K (2010) Herbicides as probes in plant biology. *Weed Sci* 58: 340–350.

36. Ferhatoglu Y, Avdiushko S, Barrett M (2005) The basis for the safening of clomazone by phorate insecticide in cotton and inhibitors of cytochrome P450s. *Pestic Biochem Physiol* 81: 59–70.
37. Ferhatoglu Y, Barrett M (2006) Studies of clomazone mode of action. *Pestic Biochem Physiol* 85: 7–14.
38. Rohmer M (1998) Isoprenoid biosynthesis via the mevalonate-independent route, a novel target for antibacterial drugs? *Progr Drug Res* 50: 135–154.
39. Rohmer M, Grosdemange-Billiard C, Seemann M, Tritsch D (2004) Isoprenoid biosynthesis as a novel target for antibacterial and antiparasitic drugs. *Curr Opin Investig Drugs* 5: 154–162.
40. Withers S, Keasling J (2007) Biosynthesis and engineering of isoprenoid small molecules. *Appl Microbiol Biotechnol* 73: 980–990.
41. Witschel M, Röhl F, Niggeweg R, Newton T (2013) In search of new herbicidal inhibitors of the non-mevalonate pathway. *Pest Manag Sci* 69: 559–563.
42. Service RF (2007) A growing threat down on the farm. *Science* 316: 1114–1117.
43. Service RF (2013) What happens when weed killers stop killing? *Science* 341: 1329.
44. Hale I, O'Neill PM, Berry NG, Odom A, Sharma R (2012) The MEP pathway and the development of inhibitors as potential anti-infective agents. *Med Chem Comm* 3: 418–433.
45. Singh N, Cheve G, Avery MA, McCurdy CR (2007) Targeting the methyl erythritol phosphate (MEP) pathway for novel antimalarial, antibacterial and herbicidal drug discovery: Inhibition of 1-deoxy-D-xylulose-5-phosphate reductoisomerase (DXR) enzyme. *Curr Pharm Des* 13: 1161–1177.
46. Zhao L, Chang W-c, Xiao Y, Liu H-w, Liu P (2013) Methylerythritol phosphate pathway of isoprenoid biosynthesis. *Ann Rev Biochem* 82: 497–530.
47. Zamponi GW, Stotz SC, Staples RJ, Andro TM, Nelson JK, et al. (2002) Unique structure–activity relationship for 4-isoxazolyl-1,4-dihydropyridines. *J Med Chem* 46: 87–96.
48. Deno NC (1947) Diethyl acetals of  $\alpha$ -formyl esters. *J Am Chem Soc* 69: 2233–2234.
49. Sprecher SL, Netherland MD, Stewart AB (1998) Phytoene and carotene response of aquatic plants to fluridone under laboratory conditions. *J Aquat Plant Manage* 36: 111–120.
50. Dayan FE, Owens DK, Corniani N, Silva FML, Watson SB, et al. (2014) Biochemical markers and enzyme assays for herbicide mode of action and resistance studies. *Weed Sci* DOI:10.1614/WS-D-1613-00063.00061.
51. Seefeldt SS, Jensen JE, Fuerst EP (1995) Log-logistic analysis of herbicide dose-response relationships. *Weed Technol* 9: 218–227.
52. Ritz C, Streibig JC (2005) Bioassay analysis using R. *J Statist Soft* 12: 1–22.
53. de Mendiburu F (2014) *Agricolae* Version 1.1–4. Practical Manual: 1–60.
54. Zhang J-H, Chung TDY, Oldenburg KR (1999) A simple statistical parameter for use in evaluation and validation of high throughput screening assays. *J Biomol Screen* 4: 67–73.
55. Lichtenthaler HK, Zeidler J, Schwender J, Müller C (2000) The non-mevalonate isoprenoid biosynthesis of plants as a test system for new herbicides and drugs against pathogenic bacteria and the malaria parasite. *Z Naturforsch* 55c: 305–313.
56. Zeidler J, Schwender J, Mueller C, Lichtenthaler HK (2000) The non-mevalonate isoprenoid biosynthesis of plants as a test system for drugs against malaria and pathogenic bacteria. *Biochem Soc Trans* 28: 796–798.
57. Anderson RL (1990) Tolerance of safflower (*Carthamus tinctorius*), corn (*Zea mays*), and proso millet (*Panicum miliaceum*) to clomazone. *Weed Technol* 4: 606–611.
58. Lois LM, Campos N, Putra SR, Danielsen K, Rohmer M, et al. (1998) Cloning and characterization of a gene from *Escherichia coli* encoding a transketolase-like enzyme that catalyzes the synthesis of D-1-deoxyxylulose 5-phosphate, a common precursor for isoprenoid, thiamin, and pyridoxol biosynthesis. *Proc Natl Acad Sci USA* 95: 2105–2110.
59. Baerg RJ, Barrett M, Polge ND (1996) Insecticide and insecticide metabolite interactions with cytochrome P450 mediated activities in maize. *Pestic Biochem Physiol* 55: 10–20.
60. Yasuor H, Zou W, Tolstikov VV, Tjeerdema RS, Fischer AJ (2010) Differential oxidative metabolism and 5-ketoclomazone accumulation are involved in *Echinochloa phyllopogon* resistance to clomazone. *Plant Physiol* 153: 319–326.
61. Weimer MR, Buhler DD, Balke NE (1991) Clomazone selectivity: Absence of differential uptake, translocation, or detoxication. *Weed Sci* 39: 529–534.
62. ElNaggar SF, Creekmore RW, Shcocken MJ, Rosen RT, Robinson RA (1992) Metabolism of clomazone herbicide in soybean. *J Agric Food Chem* 40: 880–883.
63. Culpepper AS, York AC, Marth JL, Corbin FT (2001) Effect of insecticides on clomazone absorption, translocation, and metabolism in cotton. *Weed Sci* 49: 613–616.
64. Chang JH, Konz MJ, Aly EA, Sticker RE, Wilson KR, et al. (1987) 3-Isoxazolidinones and related compounds a new class of herbicides. In: Baker DR, Fenyes JG, Moberg WK, Cross B, editors. *Synthesis and Chemistry of Agrochemicals*. Washington, DC: American Chemical Society. pp. 10–23.
65. Hayashi D, Kuzuyama N, Kato T, Sato Y, Ohkanda J (2013) Antimicrobial *N*-(2-chlorobenzyl)-substituted hydroxamate is an inhibitor of 1-deoxy-D-xylulose 5-phosphate synthase. *Chem Comm* 49: 5535–5537.
66. Zeidler J, Schwender J, Müller C, Weisner J, Weidemeyer C, et al. (1998) Inhibition of the non-mevalonate 1-deoxy-D-xylulose-5-phosphate pathway of plant isoprenoid biosynthesis by fosmidomycin. *Z Naturforsch* 54c: 980–986.
67. Rodríguez-Concepción M (2004) The MEP pathway: A new target for the development of herbicides, antibiotics and antimalarial drugs. *Curr Pharm Des* 10: 2391–2400.
68. Fellermeier M, Kis K, Sagner S, Maier U, Bacher A, et al. (1999) Cell-free conversion of 1-deoxy-D-xylulose 5-phosphate and 2-C-methyl-D-erythritol 4-phosphate into  $\beta$ -carotene in higher plants and its inhibition by fosmidomycin. *Tetrahed Lett* 40: 2743–2746.
69. Ershov YV (2007) 2-C-methylerythritol phosphate pathway of isoprenoid biosynthesis as a target in identifying new antibiotics, herbicides, and immunomodulators: A review. *Appl Biochem Microbiol* 43: 115–138.
70. Jomaa H, Wiesner J, Sanderbrand S, Altıncicek B, Weidemeyer C, et al. (1999) Inhibitors of the non-mevalonate pathway of isoprenoid biosynthesis as antimalarial drugs. *Science* 285: 1573–1576.
71. Fellermeier M, Raschke M, Sagner S, Wungsintaweekul J, Schuhr CA, et al. (2001) Studies on the nonmevalonate pathway of terpene biosynthesis. *Eur J Biochem* 268: 6302–6310.
72. Rohdich F, Wungsintaweekul J, Eisenreich W, Richter G, Schuhr CA, et al. (2000) Biosynthesis of terpenoids: 4-Diphosphocytidyl-2C-methyl-D-erythritol synthase of *Arabidopsis thaliana*. *Proc Natl Acad Sci USA* 97: 6451–6456.
73. Duke SO, Dayan FE (2011) Bioactivity of Herbicides. In: Murray M-Y, editor. *Comprehensive Biotechnology*. 2 ed. Amsterdam: Elsevier. pp. 23–35.
74. Ge X, d'Avignon DA, Ackerman JJH, Duncan B, Spaur MB, et al. (2011) Glyphosate-resistant horseweed made sensitive to glyphosate: low-temperature suppression of glyphosate vacuolar sequestration revealed by  $^{31}\text{P}$  NMR. *Pest Manag Sci* 67: 1215–1221.
75. Ge X, d'Avignon DA, Ackerman JJH, Sammons RD (2012) Observation and identification of 2-C-methyl-D-erythritol-2,4-cyclopyrophosphate in horseweed and ryegrass treated with glyphosate. *Pestic Biochem Physiol* 104: 187–191.
76. Hess FD (2000) Light-dependent herbicides: An overview. *Weed Sci* 48: 160–170.
77. Sui Y, Wu Z (2007) Alternative statistical parameter for high-throughput screening assay quality assessment. *J Biomol Screen* 12: 229–234.
